# Supplementary material for: Understanding teaching and learning conceptions among clinical faculty as a means to improve postgraduate training
Source: Int J Med Educ. 2020 Aug 28;11:175–85. doi: 10.5116/ijme.5f2a.76eb (PMC7882127; doi:10.5116/ijme.5f2a.76eb)
Supplement: Supplementary file 3 — Appendix 3. A Priori Codes [file ijme-11-175-S3.pdf]

### **Appendix 3.**

#### **A Priori Codes**

##### **A. A good teacher**

1. Transmits knowledge and skills within a time frame
2. Flexible and able to adjust to different types of trainees
3. Role model

##### **B. Expectations of a clinical teacher of their trainees**

1. trainees to be competent
2. apply what their consultants taught
3. prepare for exams

##### **C. Perspectives**

1. Old and new styles of teaching
2. Nurturing and developmental - "learner friendly"
3. Transmission too stiff
4. Pro-resident
5. Teach in such a way trainees are motivated to teach their juniors
6. Consultants can learn from residents

##### **D. Barriers for clinicians to implement their perspectives**

1. time
2. money
3. different quality of learners
